# Supplementary material
Source: publisher site journal article supplement (https://www.spandidos-publications.com/7723/downloadSupplementary)
Supplement: Supplementary file 1 [file downloadSupplementary]

**Appendix 1.** Evaluation Scores of the surgical approach by the attending surgeon.

Please tick a number between 1 (Reject the procedure) and 10 (The procedure is highly recommended):

0    1    2    3    4    5    6    7    8    9    10

---

0-1, reject the procedure; 2-3, consider the procedure with caution; 4-5, generally recommend this procedure; 6-8, recommend this procedure; 9-10, the procedure is highly recommended. Higher scores indicate a higher recommendation.

**Table SI.** Comparison of the two surgical approaches.

| Characteristic                             | Retroperitoneal laparoscopic adrenalectomy (left) | Transperitoneal laparoscopic adrenalectomy (right) |
|--------------------------------------------|---------------------------------------------------|----------------------------------------------------|
| Tumor size, mm                             | 75x52x33                                          | 100x87x63                                          |
| Patient position                           | Oblique lateral                                   | Lateral                                            |
| Number of assistants                       | 1                                                 | 2                                                  |
| Complications                              | No                                                | No                                                 |
| Estimated blood loss, ml                   | 85                                                | 150                                                |
| Operative time, min                        | 110                                               | 175                                                |
| Numbers of optical trocars                 | 3                                                 | 5                                                  |
| Pain face scale 24 h after surgery, VAS    | 2                                                 | 4                                                  |
| Time to flatus, h                          | 20                                                | 32                                                 |
| Postoperative hospital stay, days          | 3                                                 | 5                                                  |
| Evaluation scores of the surgical approach | 9                                                 | 6                                                  |

'Evaluation scores of the surgical approach' is a specific evaluation score used to assess the surgical treatment, detailed in the Appendix.
